# Supplementary material
Source: MDPI journal article supplement (https://www.mdpi.com/2073-4344/7/5/130)
Supplement: s1 [file s1]

**Anika Scholtissek, Dirk Tischler, Adrie H. Westphal, Willem J. H. van Berkel and  
Caroline E. Paul**

| Class I   | Class II                                                                     | Class III |
|-----------|------------------------------------------------------------------------------|-----------|
| PETNR     | -----SAEKLFTPLKVG--AVTAPNRVFMALPLTRLRSIEPGD                                  | 35        |
| MR        | -----MPDTSFSNPLGFTPLQLG--SLSLPNRVIMAPLTRSR--TPDS                             | 39        |
| SYE3      | -----MSVFTAYESG--ALTLONRIVMAPVTRARTTPQGN                                     | 33        |
| XenB      | -----MATIFDPIKLG--DLELSNRIIMAPLTRCRA--DEGR                                   | 33        |
| AcaryoER1 | -----MSISSVFEPRLG--AVDLNRNVMAPLTRGRS--GPDR                                   | 35        |
| OYE1      | -----MSFVKDFKPKQALGDTNLFKPIKIG--NNELHRAVIPPLTRMRALHPGN                       | 46        |
| ArOYE1    | -----MSDSRLFKPLKVG--SIELKNRVAMAPLTRFRASDSA                                   | 36        |
| CYE       | -----MSYMNFDPKPLGDTNIFKPIKIG--NNELKHRVMPALTRMRATAPGN                         | 46        |
| EBP1      | MTIESTNSFVVPSTKLIDVTPGLSTKFOPIKVG--NNVLQPIAYVPTTRFRASKDHI                    | 58        |
| MgER      | -----MSVNIPLGETQVFQPTKLG--KNTLSHRVFPPTTRRSLEDHT                              | 43        |
| XenA      | -----MSALFEPYTLK--DVTLRNRIAPPMCMQYMAE--DG                                    | 32        |
| FOYE-1    | -----MSLLFSPYQLG--SLSLANRLVIAPMCMQYSAY--DG                                   | 32        |
| TsOYE     | -----MLFTPLELG--GLRLKNRLMASPMCMQYSAT--LEG                                    | 31        |
| TOYE      | -----MSILHMPCLKYK--DITIKNRIMSPCMQYSAS--TDG                                   | 33        |
| YqjM      | -----MARKLFTPTITIK--DMTLKNRIVMSPCMQYSSHEKDG                                  | 35        |
| LacER     | -----MSGYHFLKPFTFKHQTITLKNRIVIPMTITRLSFEDGT                                  | 38        |
| YqiG      | -----MNPKYKLPFEPFTFKS--GVTINNRIAVPMTHYASNEDGT                                | 39        |
| Chr-OYE1  | -----MSTESLFTPFYK--NLELKNRIVMAPMTRAQS--DNG                                   | 34        |
| SYE4      | -----MTIENTVNSVENLFDYTKLND--TITLKNRILMAPLTRCMA--DANL                         | 43        |
| Nox       | -----MTAPTPSIFEPARLG--PLTLNRNIVKAATFEGV--MPRG                                | 37        |
| SecStruc: | βαβ βββ βββ                                                                  |           |
| PETNR     | IP-TPLMGEYYRQRAS--AGLIISEATQIS-AQAKGYAGAPGLHSPEQIAAWKKITAGVH                 | 91        |
| MR        | VP-GRLQQIYYQGRAS--AGLIISEATNIS-PTARGVYVTPGIWTDQAEAGWKGVVEAVH                 | 95        |
| SYE3      | IP-NDLMVQYYAQRSS--AGLIITEATQIS-NDSQGYSFTPGVYTEAQIDGWKKVTAAPH                 | 89        |
| XenB      | VP-NALMAEYYRQRAS--AGLILSEATSVT-PMGVGYPDTPGIWSDQVQRGWNITKAVH                  | 89        |
| AcaryoER1 | VP-NALMAEYYRQRAS--AGLIITEATSVT-EQAAGWSETPGIYSEADQIAWROQVTDVAH                | 91        |
| OYE1      | IPNRDWAEEYTRQAQRPGTMIITEGAFIS-POAGGYDNAPGVWSEEQMVETWKIFNATH                  | 105       |
| ArOYE1    | IL--PFAAEYYSQRASVPGTLILSEATLIT-QGHGYSNVPAIENQEQIDAWKKVTEAVH                  | 93        |
| CYE       | IPNTEWAEYYYRQRSQYPGTLIITEGTFPS-AQSGGYPNVPGIWSKEQLAEWKKIFNATH                 | 105       |
| EBP1      | --PSDLQLNYYNARSQYPGTLIITEATFAS-ERGGIDLVHPGIYNDAAQSKWKINEAIH                  | 115       |
| MgER      | --PSNLAYKYYDERSKFPGTLIISEGTFPS-AQAGLYEGVPGIWTERTQTKKHIDKIH                   | 100       |
| XenA      | LI-NDWHQVHYASMARGGAGLVVEATAVA-PEGRIITPGCAGIWSAHAQAFVPPVQAIK                  | 90        |
| FOYE-1    | IA-QDWHLMHLGRLATSGAGLVIVEATGYN-PEGRIITPFCLGLYNDEQEAALGRIVAFAR                | 90        |
| TsOYE     | EV-TDWHLLHYPTRALGGVGLILVEATAVE-PLGRITSPYDLGIWSEDLHPLGLKELARRIR               | 89        |
| TOYE      | MP-NDWHYHYATRAIGGVGLIMQEGATAVE-SRGRITDHDGLIWNDEQVKELKHIYDICK                 | 91        |
| YqjM      | KL-TPFHMAHYISRATGOVGLIIVEASAVN-POGRITDODLGIWSEDEHIEGFAKLTEQVK                | 93        |
| LacER     | VT--RDEIRYYQQRAG-GYGMFITGTANYN-ALGKGFEGLSVADDRFIPGLSKLAAMK                   | 94        |
| YqiG      | IS--EAELDYYIPRSK-EMGMVITACANYN-PDGKAFPGQPAITHDLSNIPGLKKLAQAIQ                | 95        |
| Chr-OYE1  | VP-TQKIIDYYARRAAE--GLILSEGTVINRPAKMNQNPIDFYGTEALNGWKNVTDVAH                  | 93        |
| SYE4      | VP-TDDMVAYYARRAE--AGLIISEATIIR-PDAQGYPNTPGLIFTQAQIAGWRKVTDAVH                | 99        |
| Nox       | AV-SDDLINFHAEVARGGAAMTTVAYCAVS-PGGRVHRDRTL-VMDERLALPGLRRLTDVAH               | 94        |
| SecStruc: | α1α1α1α1α1 β2β2β2β β2β2β2β                                                   |           |
| PETNR     | AED-GRIAVQLWHTGRISHSSSIQPGGQAP-----VSASALNANTRTSL-RDEN-                      | 137       |
| MR        | AKG-GRIALQLWHVGRVSHELVQPDGQQP-----VAPSALKAEGAEFCFEFED-                       | 142       |
| SYE3      | EAG-GKIFNQIWHVGRVSHPIF-QQGNAP-----IAPSAIAPVQKTVWVDEAH                        | 136       |
| XenB      | AAG-GKIVLQLWHVGRISHPLY-LNGEAP-----VAPSAIQPKGHVS-----                         | 129       |
| AcaryoER1 | QQD-GKIFLOIWHHTGRASHPDFQLNGARP-----TSASAIKPAGEVH-----                        | 132       |
| OYE1      | EKK-SFVWVQLVNLGWAAPFDNLARDGLR---YDSASDN-----VFMDAEQ                          | 147       |
| ArOYE1    | KKG-SFIYLQLWALGRVANKEFSEAHGIT-----VKSSSAT-----QLS-                           | 141       |
| CYE       | ENK-SFVWVQLVNLGRQAWPEVLKKEGLR-----YDSATDD-----LYMGEE                         | 137       |
| EBP1      | GNG-SFSSVQLWYLGRVANAKDLKDSGLP-----LIAPSA-----VYWDENS                         | 156       |
| MgER      | ENK-SFASITLWNLGRTGDPALLKKAQKP-----FLAPSA-----IYFDEES                         | 141       |
| XenA      | AAG-SVPGIQAIAHAGRKASANRPWEGDDHIGADDARGWETIAPSAI-----                         | 136       |
| FOYE-1    | EFGQAKMAIQLAHAGRKASTRRPWPDPGSPYP-EEGGWQTWAPSAIK-----                         | 136       |
| TsOYE     | EAG-AVPGIQLAHAGRKAGTARPWEGGKPL-----GWRVVGSPSPI-                              | 129       |
| TOYE      | ANG-AVMGIQLAHAGRKCNISY-----EDVVGSPSPIK-----                                  | 122       |
| YqjM      | EQG-SKIGIQLAHAGRKAELE-----GDIFAPSAI-----                                     | 123       |
| LacER     | TGG-TKAILQIFSAGRMNSKI-LRGEQP-----VSASAVA-----                                | 128       |
| YqiG      | AQG-AKAVVQIHGGITECPSEL-VPQQDV-----VGPSPV-----                                | 128       |
| Chr-OYE1  | HNG-GKMGPOIWHVGDTRSTPD-----GKIFVQLWHTGRVAHPHF-FGGGDV-----LAPSAQKIEGSPVR----- | 114       |
| SYE4      | ANG-GKIFVQLWHTGRVAHPHF-FGGGDV-----LAPSAQKIEGSPVR-----                        | 140       |
| Nox       | AEG-ALAAAOIHAGLVANTLSN-----KTKTLAPSTRL-----                                  | 127       |
| SecStruc: | α B3B383                                                                     |           |

|           |           |                                                                                                                            |                                        |                                        |                    |                |              |     |     |
|-----------|-----------|----------------------------------------------------------------------------------------------------------------------------|----------------------------------------|----------------------------------------|--------------------|----------------|--------------|-----|-----|
| Class I   | PETNR     | GNAIRVDT-TTPRALELDE                                                                                                        | IPGIVN-DFRQAVANAREAGFDLVELHSAHGYLLHQFL | SPS                                    | 195                |                |              |     |     |
|           | MR        | GTAGLHPT-STPRALETDE                                                                                                        | IPGIVE-DYRQAAQRAKRAAGFDMVEVHAANAQLPNO  | FLATG                                  | 200                |                |              |     |     |
|           | SYE3      | PEGQMVC-PEPREMTQAD                                                                                                         | IDRVVA-DFAKAGANATAAGFDGTEIHHGGNGYLLIDQ | FLRTN                                  | 194                |                |              |     |     |
|           | XenB      | LVRPLADY-PTPRALETAETAE                                                                                                     | IVE-AYRTGAENAKAAGFDGVEIHHGANGYLLDQ     | FLQSS                                  | 187                |                |              |     |     |
|           | AcaryoER1 | TPQGGKPF-VTPRAVSLDE                                                                                                        | IPSVIQ-DFAQATGNARKAGFDGVEIHHGANGYLLIDQ | FLRDG                                  | 190                |                |              |     |     |
|           | Class II  | OYE1                                                                                                                       | EAKAKKAN-NPQHS�TKDE                    | IKQYIK-EYVQAAKNSIAAGADGVEIHSANGYLLNQ   | FLDPH              | 205            |              |     |     |
|           |           | ArOYE1                                                                                                                     | -----EDL-AVPKEMTVEE                    | IKETVS-AYAQAANKNAIKAGFDGVEIHAANGYLLIDQ | FLQDT              | 184            |              |     |     |
|           |           | CYE                                                                                                                        | KERALKAN-NPQHGITKEE                    | IKQYIK-EYVDAAKKAIDAGADGVQIHHGANGYLLNQ  | FLDPI              | 205            |              |     |     |
|           |           | EBP1                                                                                                                       | EKLAKEAG-NELRALTEEE                    | IDHIVEVEYPNAAKHAEAGFDYVEIHHGAHGYLLDQ   | FLNLA              | 215            |              |     |     |
|           |           | MgER                                                                                                                       | KKAAEKAG-NPLRAMTEEE                    | IKDMIYEQYTTAAKNALAEAGFDYTELHSAHGYLLHFE | LEES               | 200            |              |     |     |
| Class III |           | XenA                                                                                                                       | ---FGAHLPNVPRAMTLD                     | DIARVKQ-DFVDAARRARDAGFEWIELHFAHGYLLGQS | FFSEH              | 192            |              |     |     |
|           |           | FOYE-1                                                                                                                     | ---FYEES-LTPHMSIED                     | LETVKQ-DFVNSAIRAERAGFKATIELHGAHGYLLIHO | FLSPL              | 191            |              |     |     |
|           |           | TsOYE                                                                                                                      | ---FDEGY-PVPEPLDEAG                    | MERILQ-AFVEGARRALRAGFQVIELHMAHGYLLSS   | FLSPL              | 184            |              |     |     |
|           |           | TOYE                                                                                                                       | ---AGDRY-KLPRELSVEE                    | IKSTVK-AFGEAAKRALAGYDVVEIHAAGYLLIHE    | FLSPL              | 177            |              |     |     |
|           |           | YqjM                                                                                                                       | ---FDEQS-ATPVEMSAEK                    | VKETVQ-EFKQAAARAKEAGFDVIEIHAAGYLLIHE   | FLSPL              | 178            |              |     |     |
|           | LacER     | --APRAGY-ETPRALTSAE                                                                                                        | IEATIH-DFQAVRRAILAGFDGIELHGANTYLIQ     | QFYSPN                                 | 184                |                |              |     |     |
|           | YqiG      | ---FDNGK-QIARALTEEE                                                                                                        | VENIVK-AFGEATRRATEAGFDGVEIHHGANGYLLIQ  | QFYSPK                                 | 183                |                |              |     |     |
|           | Chr-OYE1  | --YPLEDM-EKASTMTLED                                                                                                        | IQDTIA-QFAASAKSAKDLGFDVLEIHHGAHGYLLIDQ | FFWEG                                  | 170                |                |              |     |     |
|           | SYE4      | --MRELT-YTPKAVTVED                                                                                                         | IQGLVR-DYAKAAENAIEAGFDGVEIHHGANGYLLIDQ | FLHHD                                  | 196                |                |              |     |     |
|           | Nox       | ---SPPAM-GLVKGATLAE                                                                                                        | LDGVVS-DEERTARVAVDAGFDAIEVHLGHNYLLSS   | EMSPN                                  | 182                |                |              |     |     |
| SecStruc: |           | $\alpha 3 \alpha 3 \alpha 3 \alpha 3 \alpha 3 \alpha 3 \alpha 3 \alpha$ $\beta 4 \beta 4 \beta$ $\alpha D \alpha D \alpha$ |                                        |                                        |                    |                |              |     |     |
| Class I   | PETNR     | SNQRTDQYG-GSVENR                                                                                                           | ARLVLEVVD                              | AVCNEWS----                            | ADRI-GIRVSP        | IGTFQNV        | DNG---       | 246 |     |
|           | MR        | TNRRTDQYG-GSIENR                                                                                                           | ARFPLEVVD                              | AAEVFG----                             | PERV-GIRLTP        | FLEL           | FGLTDD---    | 251 |     |
|           | SYE3      | SNHRTDAYG-GSPEKR                                                                                                           | IRFLLEVVE                              | AAVSAQIG----                           | ADKV-GVRLAP        | YVTFK          | DMACP---     | 245 |     |
|           | XenB      | TNORTDNYG-GSLENR                                                                                                           | ARLLLEVTD                              | AAIDVWG----                            | AGRV-GVHLAP        | RADSH          | DMGDD---     | 238 |     |
|           | AcaryoER1 | TNERODAYG-GTIENR                                                                                                           | TRFLEVVE                               | AAVAVWS----                            | ADHV-GVRLSPT       | NAFND          | MRDS---      | 241 |     |
|           | OYE1      | SNTRTDQYG-GSIENR                                                                                                           | ARFTLEVVD                              | ALVEAIG----                            | HEKV-GLRLSP        | YGVFN          | SMS-GGAE     | 258 |     |
|           | ArOYE1    | VNKRTDNYG-GSIENR                                                                                                           | SRFAMEVTRA                             | IVDAIG----                             | ADKT-GIRLSP        | FSTFQ          | GMKMA---     | 235 |     |
|           | CYE       | SNNRTDQYG-GSIENR                                                                                                           | ARFTLEVVD                              | AVDAVG----                             | AERT-SIRFSP        | YGTFT          | GTMS-GGEN    | 258 |     |
|           | EBP1      | SNKRTDKYGG-GSIENR                                                                                                          | ARLLLRVVD                              | KLIEVVG----                            | ANRL-ALRLSP        | WASFQ          | GMEIEGEE     | 270 |     |
|           | MgER      | SNKRTDKYGG-GSIENR                                                                                                          | ARFVLE                                 | LDVHMISIVG----                         | AERL-GIRLSP        | WATFQ          | GMKSVHGE     | 254 |     |
| Class II  | XenA      | SNKRTDAYG-GSFDNR                                                                                                           | SRFLLLET                               | LAARVWP----                            | ENLPLTAR           | FGVLE          | YD-----GR    | 240 |     |
|           | FOYE-1    | SNQRQDQYG-GSLENR                                                                                                           | VRYPLEILSAV                            | KHALS----                              | AEMVVGMR           | ISAVD          | WA-----P-    | 238 |     |
|           | TsOYE     | SNQRTDAYG-GSLENR                                                                                                           | VRFPQLQAQAV                            | REVVP----                              | RELPLFVR           | VSATD          | WDWG-----E-  | 231 |     |
|           | TOYE      | SNKRKDEYG-NSIENR                                                                                                           | ARFLIEVIDE                             | VRKNWP----                             | ENKPIFVR           | VASAD          | DYD-----E-   | 224 |     |
|           | YqjM      | SNHRTDQYG-GSPENR                                                                                                           | YRFLREIIDE                             | VKQVWD----                             | GPLFVR             | VASAD          | YD-----D-    | 223 |     |
|           | LacER     | SNRRTDEWG-GDRDKR                                                                                                           | VRFPPLAVVHAE                           | KVIATIDRPFLL                           | GYRISPEELEQ-----   |                |              | 235 |     |
|           | YqiG      | TNQRTDRWG-GSDEKR                                                                                                           | LAFPLAIVDE                             | VKAASEHAKGAF                           | LVGYRLSPEEPET----- |                |              | 234 |     |
|           | Chr-OYE1  | TNTRTDQYGGGKTIKERS                                                                                                         | RFADVVKAI                              | TRAAGV----                             | EDFTIIIRL          | SQWKQ          | QDYSVKLAHT   | 226 |     |
|           | SYE4      | SNRRTDQYG-GTPVNM                                                                                                           | SRFALVVDA                              | IIARIG----                             | HDRT-GLRIS         | PGAYF          | NMAS-D---    | 246 |     |
|           | Nox       | LNKRHDRYG-GSAKRAE                                                                                                          | YPRRVIEAVR                             | VAAGV----                              | SSVAVTAK           | FNMSD          | GV-----P-    | 229 |     |
| SecStruc: |           | $\alpha 4 \alpha 4 \alpha 4 \alpha 4 \alpha 4 \alpha 4 \alpha 4$ $\beta 5 \beta 5 \beta 5 \beta 5$                         |                                        |                                        |                    |                |              |     |     |
| Class I   | PETNR     | PNEEA-DALYLIEE                                                                                                             | LAKR-----                              | GI-AYLHMSE-----                        |                    |                | TD-          | 274 |     |
|           | MR        | -EPEA-MAFYLAGEL                                                                                                            | DRR-----                               | GL-AYLHFNE-----                        |                    |                | PD-          | 278 |     |
|           | SYE3      | -EIVE-TILLAAKQL                                                                                                            | SFA-----                               | GV-AYLHSE-----                         |                    |                | AD-          | 272 |     |
|           | XenB      | -NLAE-TFTYVARE                                                                                                             | LGKR-----                              | GI-AFICSRE-----                        |                    |                | KE-          | 265 |     |
|           | AcaryoER1 | -NPIS-TFTHAAQA                                                                                                             | LNTY-----                              | NL-AYLHVLE-----                        |                    |                | AL-          | 268 |     |
|           | OYE1      | TGIVA-QYAYVAGE                                                                                                             | LEKRAKAGKRL-AFV                        | HLVE-----                              |                    |                | PR-          | 291 |     |
|           | ArOYE1    | -EPIP-QFSDI                                                                                                                | IKKL-----                              | NSLNL-AYLHMVD-----                     |                    |                | SR-          | 262 |     |
|           | CYE       | PGIVA-QYAYVIGE                                                                                                             | LEKRARAGKRL-AFID                       | LVE-----                               |                    |                | PR-          | 291 |     |
|           | EBP1      | IH-----                                                                                                                    | SYILQQLQQRAD                           | NGQQL-AYISLVE-----                     |                    |                | PR-          | 298 |     |
|           | MgER      | VHPLT-TYSYLVNE                                                                                                             | LEKRAQAGNRL-AYIS                       | LVE-----                               |                    |                | PR-          | 287 |     |
| Class II  | XenA      | DEQTL                                                                                                                      | EESIELARRFKAG-----                     | GL-DLLSVSVGF-----                      |                    |                |              | 269 |     |
|           | FOYE-1    | GGLTIEESIT                                                                                                                 | FSQECEKR-----                          | GA-GFIHVSTGG-----                      |                    |                |              | 267 |     |
|           | TsOYE     | GGWSLED                                                                                                                    | TAFARRLKEL-----                        | GV-DLLDCSSGG-----                      |                    |                |              | 260 |     |
|           | TOYE      | GGINIDM                                                                                                                    | MVEYINMI-KD-----                       | KV-DLIDVSSGG-----                      |                    |                |              | 252 |     |
|           | YqjM      | KGLDIADHIG                                                                                                                 | FAKWMKEQ-----                          | GV-DLIDCSSGA-----                      |                    |                |              | 252 |     |
|           | LacER     | PGITLDD                                                                                                                    | TALIDALKQT-----                        | KI-DYLHVSQSDV-----                     |                    |                | WR-----      | TS- | 269 |
|           | YqiG      | PGLTMTET                                                                                                                   | YTLVDALGDK-----                        | EL-DYLHISLMDV-----                     |                    |                | NS-----      | KA- | 268 |
|           | Chr-OYE1  | PEEME-EWLL                                                                                                                 | PLKDA-----                             | GV-DIFHCSQRRF-----                     |                    |                | WE-----      | PE- | 256 |
|           | SYE4      | SRDRV-VFDYLL                                                                                                               | PELEKR-----                            | DL-AFVHIGI-----                        |                    |                | FD-----      |     | 274 |
|           | Nox       | KGLWLDQSL                                                                                                                  | PIAQIL                                 | LEAD-----                              | GHLDAMQLTG         | SSLLNGMYFFRGEV | PLAEFVASQPKL |     | 284 |
| SecStruc: |           | $\alpha 5 \alpha 5 \alpha 5 \alpha 5 \alpha 5 \alpha 5 \alpha$ $\beta 6 \beta 6 \beta$                                     |                                        |                                        |                    |                |              |     |     |

|           |           |                                                               |     |
|-----------|-----------|---------------------------------------------------------------|-----|
| Class I   | PETNR     | -----LAGG-KPYS-----EAFRQKVRERFH--GVIIGAGA-----                | 302 |
|           | MR        | -----WIGGDITYP-----EGFREQMRQRFK--GGLIYCGN-----                | 307 |
|           | SYE3      | -----WDDAPQ-IP-----ESFRIELRNVEFK--GSIIIVAGR-----              | 300 |
|           | XenB      | -----GA-----DSLGPQLKEAFG--GAYIANER-----                       | 287 |
|           | AcaryoER1 | -----QGHMLAVEG-----ERVTPYIRQVFQ--GPLMINGG-----                | 297 |
| Class II  | OYE1      | -----VTNPFLTEGEGEYEYEGSNDVYSIWK--GPVIRAGN-----                | 325 |
|           | ArOYE1    | -----VSGDASIEGYDSLE----PLIPLYTS--SPLL IAGG-----               | 292 |
|           | CYE       | -----VTDPFLEFEKWFKEGTNEFIYSIWK--GPVLRVGN-----                 | 325 |
|           | EBP1      | -----VTGIYDVSL-KDQQGRSNEFAYKIWK--GNFIRAGN-----                | 331 |
|           | MgER      | -----VDGINSVEK-KDQTG--NNDFVKDLWK--GTILKAGN-----               | 319 |
| Class III | XenA      | -----TIPETNIPWGPAFMGPIAERVVREAK--LPVTSAWG-----                | 303 |
|           | FOYE-1    | -----LVAHQQIPVGPQGYQVEHAQAIKQNVN--IPTMAVGL-----               | 301 |
|           | TsOYE     | -----VVLRVRIPLAPGFQVPPFADAVRKRVG--LRTGAVGL-----               | 294 |
|           | TOYE      | -----L-LNVLDINLYPGYQVKYAEIKKRCN--IKTSAVGL-----                | 285 |
|           | YqjM      | -----L-VHADINVFPQGYVSFAEKIREQAD--MATGAVGM-----                | 285 |
|           | LacER     | -----LRNPEDTAI-----MNEQIRDHVAGAFPVIVVGG-----                  | 298 |
|           | YqiG      | -----RRGADPTRT-----RMDLLNERVGNKVPLIAVGS-----                  | 297 |
|           | Chr-OYE1  | -----FEGSDL-----NFAGWAKKITG--QPTITVGSVGLGDFMAAFGGQG           | 296 |
|           | SYE4      | -----DSIEFDYLG-----GTASSYVRAHYG--KTLVGVGS-----                | 303 |
|           | Nox       | VGYGLKFYGPKIFPTYPFEEGFLPFARQFRQALR--MPLILLGG-----             | 327 |
| SecStruc: |           | α6α6α6α6α6 β7β7                                               |     |
| Class I   | PETNR     | -YTAEKAE--DL--IGKGLIDAVAFGRDYIANPDLVARLQKKAEL--N----PQRPESEFY | 351 |
|           | MR        | -YDAGRAQ--AR--LDDNTADAVAFGRPFIANPDLPERFRLGAAL--N----EPDPSTFY  | 356 |
|           | SYE3      | -YDVERAN--DV--IEKGYADLVAFGRAFIANPDLPYRLANQLPL--S----PFDKGPLF  | 349 |
|           | XenB      | -FTKDSAN--AW--LAEGKADAVAFGVPIANPDLPARLKADAPL--N----EPRPELFY   | 336 |
|           | AcaryoER1 | -YDAVSGA--AA--IANQEAADVAYGVPIANPDLPERFAKQAPL--N----EPDPSTFY   | 346 |
| Class II  | OYE1      | -FALHPE---VVREEVKDKRTLIGYGRFFISNPDLVDRLEKGLPL--N----KYDRDTFY  | 375 |
|           | ArOYE1    | -FKADSAR-RLDDEEHKGRDVVVVGRYFISTPDLVYRLNKGIEF--T----PYDRDTFY   | 344 |
|           | CYE       | -YALDPD---QATLDSKKPNTLIGYGRSFIANPDLVYRLEKGLPL--N----KYDRNTFY  | 375 |
|           | EBP1      | -YTYDAPEFKTLINDLKNDRSIIGFSRFFTSNPDLVEKLKLGKPL--N----YYNREEFY  | 384 |
|           | MgER      | -YTYDAPKFGQLDDVSDGRTLVGFSRYFISNPDLISRLEKGHQL--A----PYERETFY   | 372 |
| Class III | XenA      | -FGTPQL---AEALQANQLDLVSVGRAHLADPHWAYFAAKELGVEKA----SWTLAPY    | 355 |
|           | FOYE-1    | -ITHSAQ---AETILKSEQADMIATARAALKNPHWPWTAAL ELGDKPF-----APPOY   | 350 |
|           | TsOYE     | -ITTPEQ---AETLLQAGSADLVLLGRVLLRDPYFPLRAAKALGVAP-----VPPQY     | 343 |
|           | TOYE      | -ITTQEL---AEELISNERADLVALGRELRLNPPYWLHTYT--SKED-----WPKQY     | 331 |
|           | YqjM      | -ITDGS---AEELQNGRADLIFIGRELRLDPFFARTAAKQLNTEIP-----APVOY      | 334 |
|           | LacER     | -IKT--PA--DAEK-AAESFDLVAIGHMIREPHHWQKVLHDHDEKAIRYQIAPADLEELG  | 352 |
|           | YqiG      | -IHS--AD--DALAVIENGIPLVAMGREILVDPNWTVKVKEGREKQIETVIKGTDKKEYH  | 352 |
|           | Chr-OYE1  | TEKADLTE--LTKRLERGDFDLVAVGRALLQDPEWAKKVKEQNTALL----DFSAESLG   | 350 |
|           | SYE4      | -YSAETAS--KA--IAEDKFDLIAIGRPFIANPDYVAKVRNSEEL--V----AYSDEMLA  | 352 |
|           | Nox       | -INRVDT---IEHALDE-GFEFVAMARALLRDPQLVNKFQAESVDQGLCTHCNCKMPTTY  | 382 |
| SecStruc: |           | α7α7α7α7α7α7 β8β8 α8α8α8α8α8α8 αFα                            |     |
| Class I   | PETNR     | GG-----GAEGYTDYPSL-----                                       | 364 |
|           | MR        | GG-----AEVGYTDYPFLDNHGDRLG-----                               | 377 |
|           | SYE3      | GG-----SAAGYTDYPSYQAALRAVIRSSDDEVA----                        | 378 |
|           | XenB      | GK-----GPVGYIDYPTL-----                                       | 349 |
|           | AcaryoER1 | TR-----GAEGYTDYPFLDPLITAA-----                                | 366 |
| Class II  | OYE1      | QM-----SAHGYIDYPTYEEALKLGWDKK-----                            | 399 |
|           | ArOYE1    | TPK-----SEKGYTDYPFSEEFKASANL-----                             | 367 |
|           | CYE       | TF-----TKEGYTDYPSYEESSVAKGYKKEEKY----                         | 403 |
|           | EBP1      | KY-----YNYGYNSYDESEKQVIGKPLA-----                             | 407 |
|           | MgER      | GR-----SDFGYNDYPKYGEKREDAEVAKKRVPEELVV                        | 405 |
| Class III | XenA      | AH-----WLERYR-----                                            | 363 |
|           | FOYE-1    | QR-----AR-----                                                | 354 |
|           | TsOYE     | QR-----GF-----                                                | 347 |
|           | TOYE      | ER-----AFKK-----                                              | 337 |
|           | YqjM      | ER-----GW-----                                                | 338 |
|           | LacER     | IAPTFLDFIESISGGAKGVPLTTAQSVT---SSNVTQD-----                   | 387 |
|           | YqiG      | LPEPLWQAIVNTQG---WVPYKD-----                                  | 372 |
|           | Chr-OYE1  | VL-----Y-----                                                 | 353 |
|           | SYE4      | SL-----I-----                                                 | 355 |
|           | Nox       | TG-----TRCVVRDALVVREAPRLGQ-----                               | 403 |

**Figure S1.** Multiple sequence alignment of OYEs from class I, II and III and non-assignable OYEs. Shading indicates conservation of amino acids among the sequences according to each class. Black shading represents conserved residues among all OYE family members. Yellow shading represents unique conserved residues for class I. Grey shading represents unique conserved residues for class II. Green shading highlights unique conservation for class III. When the conservation was found for another class as well, it was highlighted in the same colour. LacER, YqiG, Chr-OYE1, SYE-4 and Nox represent non-assignable OYEs according to the phylogenetic analysis (Figure 2 in the original manuscript). Conserved residues for non-assignable OYEs were highlighted according to the three OYE classes as described. The multiple sequence alignment was performed via Web Service applying Clustal Omega [1]. Secondary protein structure prediction was performed via Jpred4 Incorporating Jnet server [2].

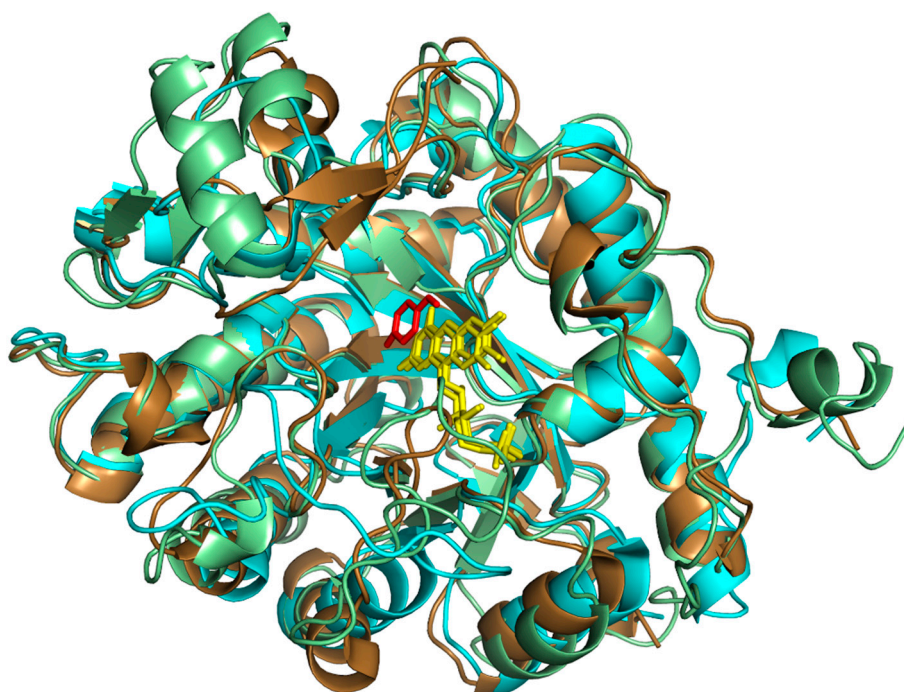

**Figure S2.** Overlay of three-dimensional model of the crystal structure of SYE1 (in gold, pdb entry: 2QG9; class I) from *Shewanella oneidensis*, OYE1 (in light green, pdb entry: 1OYA; class II) from *Saccharomyces pastorianus* and YqjM (in turquoise, pdb entry: 1Z41; class III) from *Bacillus subtilis*. The FMN cofactor is shown as stick model and coloured in yellow. The rms distances (rmsd) were obtained from overlaid structures between SYE1 and OYE1 (0.667 Å), SYE1 and YqjM (1.055 Å), OYE1 and YqjM (1.262 Å).

## References

1. McWilliam, H.; Li, W.; Uludag, M.; Squizzato, S.; Park, Y.M.; Buso, N.; Cowley, A.P.; Lopez, R. Analysis tool web services from the EMBL-EBI. *Nucleic Acids Res.* **2013**, *41*, W597–W600.
2. Drozdetskiy, A.; Cole, C.; Procter, J.; Barton, G.J. JPred4: A protein secondary structure prediction server. *Nucleic Acids Res.* **2015**, *43*, W389–W394.
